# Supplementary material for: Social Media Surveillance of Multiple Sclerosis Medications Used During Pregnancy and Breastfeeding: Content Analysis
Source: PubMed Central journal article supplement (PMC6702799; doi:10.2196/13003), 2019-08-07
Supplement: jmir_v21i8e13003_app1.pdf [file jmir_v21i8e13003_app1.pdf]

## Search terms used to filter multiple sclerosis product-relevant data

| Product            | Synonyms                                                                |
|--------------------|-------------------------------------------------------------------------|
| alemtuzumab        | alemtuzumab, Lemtrada™                                                  |
| teriflunomide      | teriflunomide, Aubagio™                                                 |
| interferon beta-1a | interferon beta-1a, Avonex™, Plegridy™, Rebif™                          |
| interferon beta-1b | interferon beta-1b, Betaferon™, Betaseron™, Ferona™, Extavia™, Compesk™ |
| glatiramer acetate | glatiramer acetate, Copaxone™, Glatopa™                                 |
| daclizumab         | Daclizumab                                                              |
| dimethyl fumarate  | dimethyl fumarate, Tecfidera™                                           |
| fingolimod         | fingolimod, Gilenya™                                                    |
| natalizumab        | natalizumab, Tysabri™                                                   |
